# Supplementary material
Source: Springer Nature journal article supplement (https://www.springermedizin.de/resource/supplementary/13075_2012_3667_MOESM5_ESM.pdf/9695072)

# IgM SSA/SSB

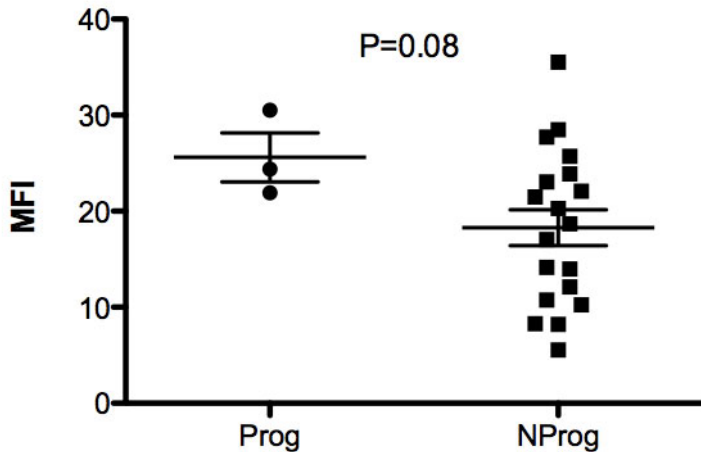

Supplement: MOESM5 [file 9695072]
